# Supplementary material for: CAR Protects Females from Diet-Induced Steatosis and Associated Metabolic Disorders
Source: MDPI journal article supplement (doi:10.3390/cells12182218), 2023-09-06
Supplement: s1 [file s1]

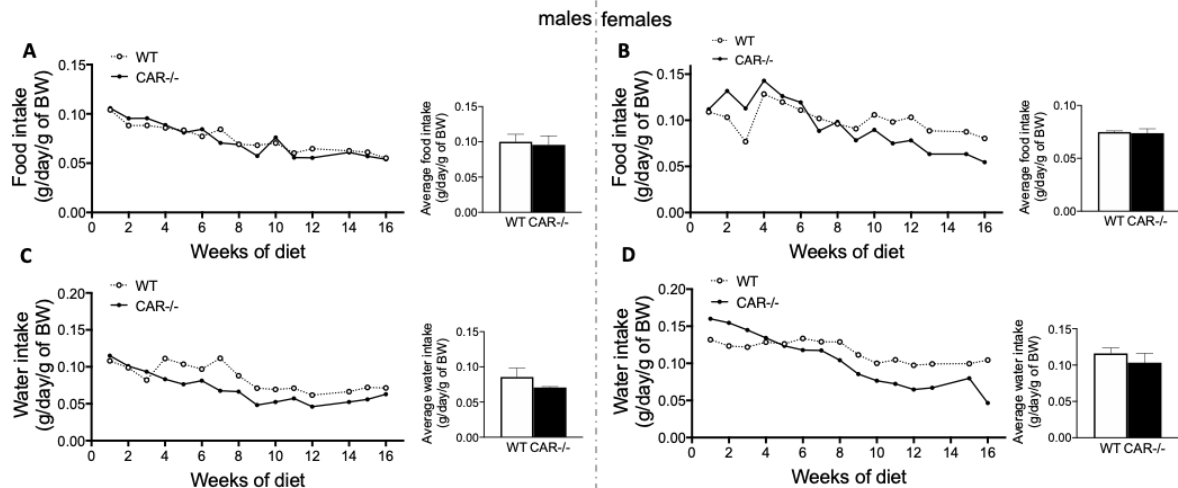

**Supplementary Figure S1: CAR deletion does not affect food and water intake of mice.** Food (A, B) and water (C, D) intake of males and females were measured weekly for each cage throughout the 16 weeks of HFD and averaged by day and by grams of mean body weight (BW) per cage (n=2 cages per group). An overall average of the 16 weeks was calculated.

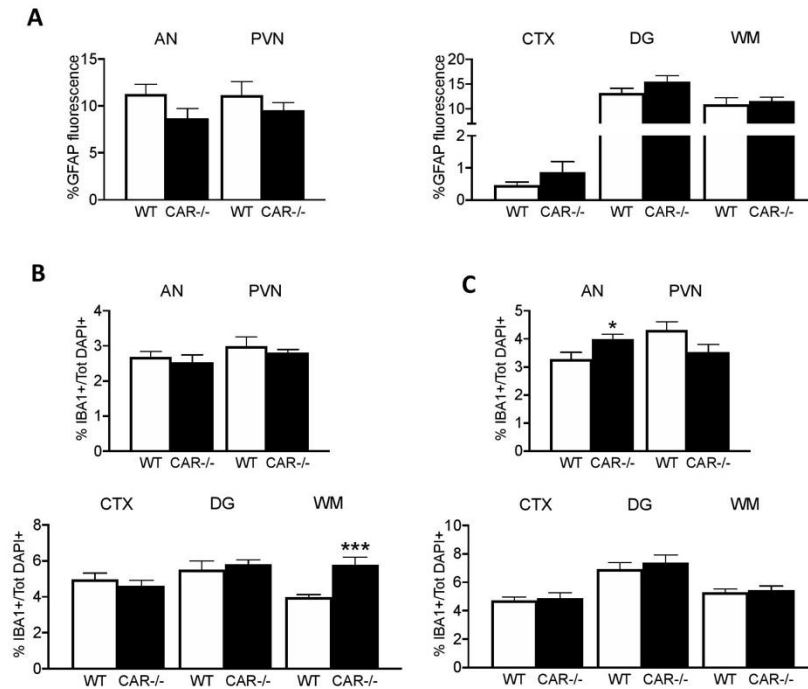

**Supplementary Figure S2: CAR deletion induces dimorphic central adaptations.** A: Quantification of GFAP expression in males, in the arcuate (AN) and paraventricular (PVN) nuclei of hypothalamus, Cortex (CTX), Dentate Gyrus (DG) and White Matter (WM). Histological slices were also stained for IBA1 expression, a microglial marker, in the same regions in males (B) and females (C).

**Supplementary Table S1 : Precise criteria used in the NAS scoring system**

| Steatosis score |        |           |                | Inflammation score       | Fibrosis score                        |
|-----------------|--------|-----------|----------------|--------------------------|---------------------------------------|
| Value           | Area   | Location  | Morphology     |                          |                                       |
| 0               | <5%    | Zone 3    |                | No foci                  | None                                  |
| 1               | 5-33%  | Zone 1    | Microvesicular | 1 foci at 20x field      | Zone 3 and/or perisinusoidal fibrosis |
| 2               | 34-36% | Azonal    |                | 2 to 4 foci at 20x field | As grade 1 and portal fibrosis        |
| 3               | >66%   | Panacinar |                | >4 foci at 20x field     | As grade 2 and bridging fibrosis      |
| 4               | /      | /         | /              | /                        | Cirrhosis                             |

**Supplementary Table S2.** Oligonucleotide primers used for qPCR assays.

| Gene           | Forward 5'-3'          | Reverse 3'-5'        |
|----------------|------------------------|----------------------|
| <i>Tnfa</i>    | TCCCCAAAGGGATGAGAAGTTC | GCGCTGGCTCAGCCACT    |
| <i>Il1β</i>    | GCCCATCCTCTGTGACTCAT   | AGGCCACAGGTATTTGTCTG |
| <i>Pdgfr1β</i> | TGTGCAGTTGCCTTACGACT   | CAGGTGGGGTCCAAGATGAC |
| <i>Col1a1</i>  | AGCACGTCTGGTTTGGAGAG   | GACATTAGGCGCAGGAAGGT |
| <i>Tgfb1</i>   | GTCACGTGGAGTTGTACGGCA  | GGGGCTGATCCCGTTGATTT |
| <i>Tgfb1</i>   | GCATTGGCAAAGGTCGGTTT   | TGCCTCTCGGAACCATGAAC |
| <i>Acta2</i>   | AGCTACGAACTGCCTGACGG   | CGTGGATGCCCGCTGAC    |

**Supplementary Table S3: Primary/secondary antibodies used for immunohistochemistry**

| Primary antibodies   | Host                                                     | Vendor                    | Reference           | Dilution          |
|----------------------|----------------------------------------------------------|---------------------------|---------------------|-------------------|
| Anti-IBA1            | Anti-rabbit                                              | Wako Laboratory Chemicals | 019-19741           | 1/1000            |
| Anti-GFAP            | Anti-chicken                                             | Abcam                     | Ab4674              | 1/300             |
| DAPI                 | Vectashield : mountain medium for fluorescence with DAPI |                           | Vector Laboratories | H-1200            |
|                      |                                                          |                           |                     | [DAPI] = 1.5µg/ml |
| Secondary antibodies | Host                                                     | Vendor                    | Reference           | Dilution          |
| Anti-IBA1            | Donkey anti-rabbit Alexa Fluor 488                       | Jackson ImmunoResearch    | 711-545-152         | 1/500             |
| Anti-GFAP            | Donkey anti-chicken Alexa Fluor                          | Jackson ImmunoResearch    | 703-165-155         | 1/500             |
|                      | Cy3                                                      |                           |                     |                   |

**Supplementary Table S4:** Kegg pathway enrichment of cluster 3 and 7 of heat map

|           | Kegg pathways                                | P-value  | Gene names                                                                                              |
|-----------|----------------------------------------------|----------|---------------------------------------------------------------------------------------------------------|
| Cluster 3 | Ribosome                                     | 1.134e-9 | RPL30;RPL3;RPS5;MRPL15;RPL8;RPL9;RPL7;RPS26;RPS28;RPS27;RPS15A;RPS18;RPS3;RPL26;RPL15;RPS10;RPL28;RPS13 |
|           | Linoleic acid metabolism                     | 2.431e-5 | CYP2C68;CYP3A41A;CYP3A11;CYP3A44;CYP2C40;CYP2C70;CYP3A16                                                |
|           | Complement and coagulation cascades          | 1.515e-4 | FGB;C3;F7;F10;SERPINF2;CFI;CFB;KNG1                                                                     |
|           | Chemical carcinogenesis                      | 2.398e-4 | ALDH3B2;CYP2C68;CYP3A41A;CYP3A11;CYP3A44;CYP2C40;CYP2C70;CYP3A16                                        |
|           | Steroid hormone biosynthesis                 | 9.389e-4 | CYP2C68;CYP3A41A;CYP3A11;CYP3A44;CYP2C40;CYP2C70;CYP3A16                                                |
|           | Retinol metabolism                           | 0.001    | CYP2C68;CYP3A41A;CYP3A11;CYP3A44;CYP2C40;CYP2C70;CYP3A16                                                |
|           | Adipocytokine signaling pathway              | 0.008    | LEPR;AKT1;IRS2;PRKAB1;CAMKK2                                                                            |
| Cluster 7 | Drug metabolism                              | 2.649e-8 | UGT2B36;UGT2B35;MGST1;HPRT;FMO5;UGT1A6B;CES2B;CES2C;CES2E;GSTA3;CES1E;GSTA2;CMPK1;AOX1;GSTM6            |
|           | Metabolism of xenobiotics by cytochrome P450 | 1.239e-5 | AKR7A5;UGT2B36;UGT2B35;GSTA3;GSTA2;MGST1;CYP1A1;UGT1A6B;GSTM6                                           |
|           | Ascorbate and aldarate metabolism            | 2.054e-5 | UGDH;ALDH2;UGT2B36;UGT2B35;ALDH7A1;UGT1A6B                                                              |
|           | Valine, leucine and isoleucine degradation   | 2.673e-5 | BCKDHA;ECHS1;AUH;ALDH2;AGXT2;AOX1;ALDH7A1;HSD17B10                                                      |
|           | Parkinson disease                            | 3.183e-4 | NDUF55;NDUFA3;NDUFA10;NDUFB3;NDUFA2;UQCRC1;COX7A2;UQCRC11;PARK7;PRKACA;GNAI1                            |
|           | Alzheimer disease                            | 4.645e-4 | NDUF55;NDUFA3;NDUFA10;NDUFB3;NDUFA2;UQCRC1;FAS;COX7A2;UQCRC11;CAPN1;GAPDH;HSD17B10                      |
|           | Thermogenesis                                | 5.641e-4 | COX19;NDUFA3;NDUFA10;NDUFB3;NDUFA2;UQCRC1;COX7A2;ARID1B;ADCY6;NDUF55;UQCRC1;PPARG;PRKACA;COA6           |
